# Supplementary material for: Unique Associations between Childhood Temperament Characteristics and Subsequent Psychopathology Symptom Trajectories from Childhood to Early Adolescence
Source: Springer Nature journal article supplement (doi:10.1007/s10802-016-0236-7), 2016-12-09
Supplement: MOESM1 [file 11915604]

Table S1. *Model Fit Indices for Latent Class Growth Analyses within the Parameterisations that Provided Good Fit in Latent Growth Curve Models*

| Psychopathology Domain | *k* | BIC | Entropy | LMR LRT *p-*value |
| --- | --- | --- | --- | --- |
| Intercept and Slope | | | | |
| Anxiety | 1 | 43382.72 | N/A | N/A |
|  | 2 | 38204.13 | .81 | <.001 |
|  | **3** | **36859.51** | **.77** | **<.001** |
|  | 4 | 36437.38 | .75 | .096 |
| Depression | 1 | 47185.15 | N/A | N/A |
|  | 2 | 43805.62 | .83 | <.001 |
|  | 3 | 43110.58 | .83 | .002 |
|  | **4** | **42499.62** | **.82** | **.017** |
|  | 5 | 42251.36 | .83 | .260 |
| Conduct Disorder | 1 | 59688.18 | N/A | N/A |
|  | 2 | 53178.91 | .85 | <.001 |
|  | 3 | 51205.86 | .83 | <.001 |
|  | **4** | **50631.87** | **.78** | **.001** |
|  | 5 | 50310.47 | .77 | .358 |
| ADHD | 1 | 59217.01 | N/A | N/A |
|  | 2 | 51802.92 | .79 | <.001 |
|  | 3 | 49050.43 | .79 | <.001 |
|  | 4 | 48281.14 | .75 | <.001 |
|  | **5** | **47976.20** | **.71** | **<.001** |
|  | 6 | 47785.22 | .69 | .059 |
| Intercept, Slope, and Quadratic terms | | | | |
| Anxiety | 1 | 43391.11 | N/A | N/A |
|  | 2 | 38186.94 | .81 | <.001 |
|  | ***3*** | ***36780.51*** | ***.78*** | ***<.001*** |
|  | 4 | 36400.85 | .75 | .103 |
| Depression | 1 | 47193.56 | N/A | N/A |
|  | 2 | 43799.54 | .83 | <.001 |
|  | 3 | 42983.39 | .82 | <.001 |
|  | 4 | 42063.03 | .82 | <.001 |
|  | ***5*** | ***41687.84*** | ***.83*** | ***.003*** |
|  | 6 | 41412.01 | .84 | .154 |
| Conduct Disorder | 1 | 59696.69 | N/A | N/A |
|  | 2 | 53134.91 | .85 | <.001 |
|  | 3 | 5116.05 | .82 | .001 |
|  | ***4*** | ***50553.85*** | ***.78*** | ***.004*** |
|  | 5 | 50181.91 | .79 | .075 |
| ADHD | 1 | 59225.45 | N/A | N/A |
|  | 2 | 51771.35 | .79 | <.001 |
|  | 3 | 48961.59 | .79 | <.001 |
|  | 4 | 48188.78 | .75 | .001 |
|  | ***5*** | ***47866.58*** | ***.71*** | ***<.001*** |
|  | 6 | 47679.74 | .72 | .086 |
| Intercept, Slope, Quadratic, and Cubic Terms | | | | |
| Anxiety | 1 | 43398.85 | N/A | N/A |
|  | 2 | 38201.07 | .81 | <.001 |
|  | **3** | **36853.97** | **.78** | **<.001** |
|  | 4 | 36431.96 | .75 | .105 |
| Depression | 1 | 47201.61 | N/A | N/A |
|  | 2 | 43811.84 | .83 | <.001 |
|  | 3 | 42978.24 | .82 | <.001 |
|  | 4 | 42044.78 | .82 | <.001 |
|  | 5 | 41642.27 | .83 | .001 |
|  | **6** | **41317.68**a | **.82** | **.002** |
|  | 7 | 41046.87 | .83 | .256 |
| Conduct Disorder | 1 | 59705.18 | N/A | N/A |
|  | 2 | 53148.68 | .85 | <.001 |
|  | 3 | 51170.86 | .82 | <.001 |
|  | **4** | **50577.93** | **.78** | **.008** |
|  | 5 | 50200.78 | .78 | .602 |
| ADHD | 1 | 59233.95 | N/A | N/A |
|  | 2 | 51784.16 | .79 | <.001 |
|  | 3 | 48978.52 | .79 | <.001 |
|  | 4 | 48219.70 | .75 | .003 |
|  | **5** | **47900.44** | **.71** | **<.001** |
|  | 6 | 47685.75 | .72 | .236 |

*Note*. *k* = number of classes in the LCGA; BIC = Bayesian information criterion; LMR LRT = Lo-Mendell-Rubin likelihood ratio test. The best model for each psychopathology domain within each parameterization is shown in bold; the best model overall is shown in bold italics.

a This model included two classes in which depression symptoms peaked at ages 6-7/8-9 and ages 8-9/10-11, respectively; both started at the sample mean at ages 4-5 and returned to the sample mean at ages 12-13. We therefore selected the strongest (five-class) model with intercept, slope, and quadratic terms as the best model for depression, which combined these two groups and summarized their substantively overlapping developmental trajectories in the Peak at Age 8-9 class.
